# Supplementary material for: Direct electrosynthesis of a series of novel caffeic acid analogues through a clean and serendipitous domino oxidation/thia-Michael reaction
Source: Royal Society of Chemistry journal article supplement (doi:10.1039/c4ra02046d), 2014-01-01
Supplement: c4ra02046d1.pdf [file c4ra02046d1.pdf]

## Supporting Information

### **Direct electrosynthesis of a series of novel caffeic acid analogues through a clean and serendipitous domino oxidation/thia-Michael reaction**

A. Alizadeh<sup>\*a,b</sup>, M. M. Khodaei<sup>\*a</sup>, M. Fakhari<sup>a</sup> and M. Shamsuddin<sup>b</sup>

<sup>a</sup> *Department of Organic Chemistry, Faculty of Chemistry and Nanoscience & Nanotechnology  
Research Center (NNRC), Razi University, Kermanshah, 67149 Iran; Phone: (98) 831 4274562  
(Ext. 300); Fax: (98) 831 4274559; Email: [ahalizadeh2@hotmail.com](mailto:ahalizadeh2@hotmail.com);*

<sup>b</sup> *Ibnu Sina Institute for Fundamental Science Studies, Universiti Teknologi Malaysia, 81310 UTM,  
Johor Baharu, Johor, Malaysia*

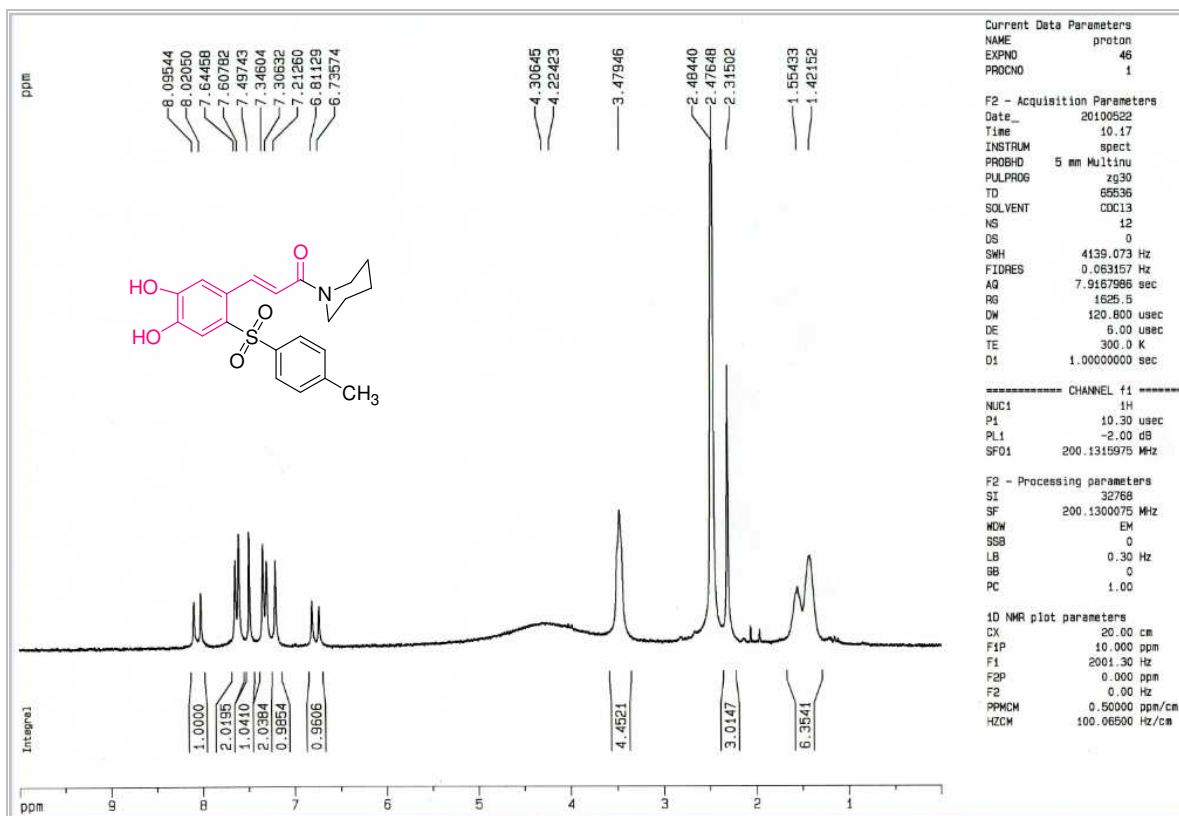

Figure S-1. <sup>1</sup>H NMR spectrum of compound 5a in DMSO-d<sub>6</sub>

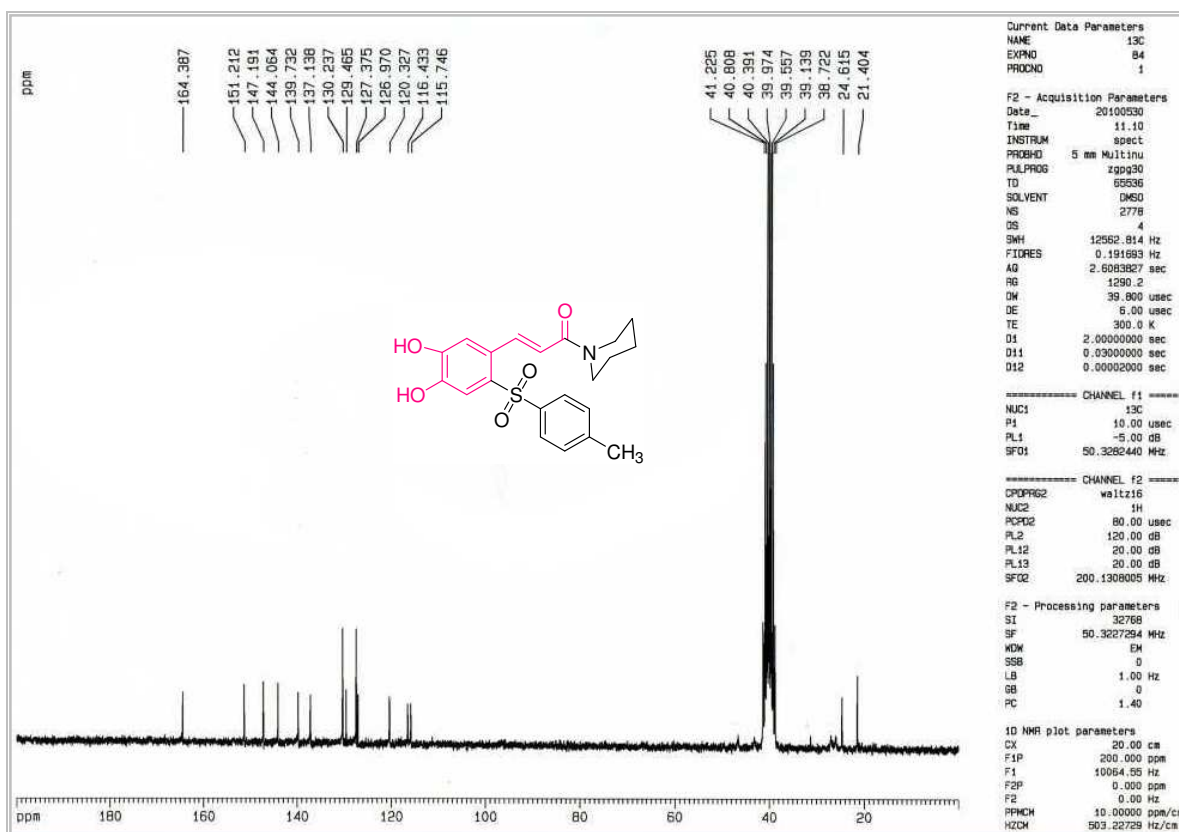

Figure S-2. <sup>13</sup>C NMR spectrum of compound 5a in DMSO-d<sub>6</sub>

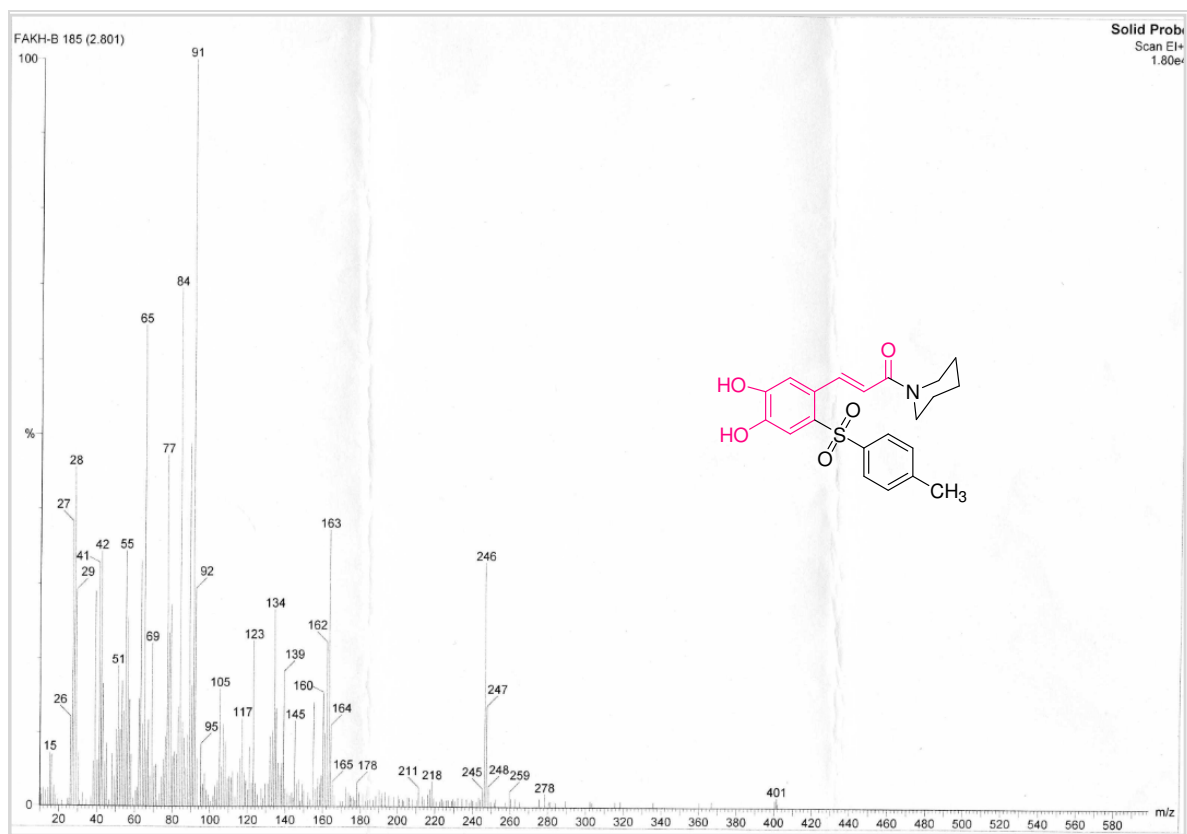

**Figure S-3.** Mass spectrum of compound **5a**

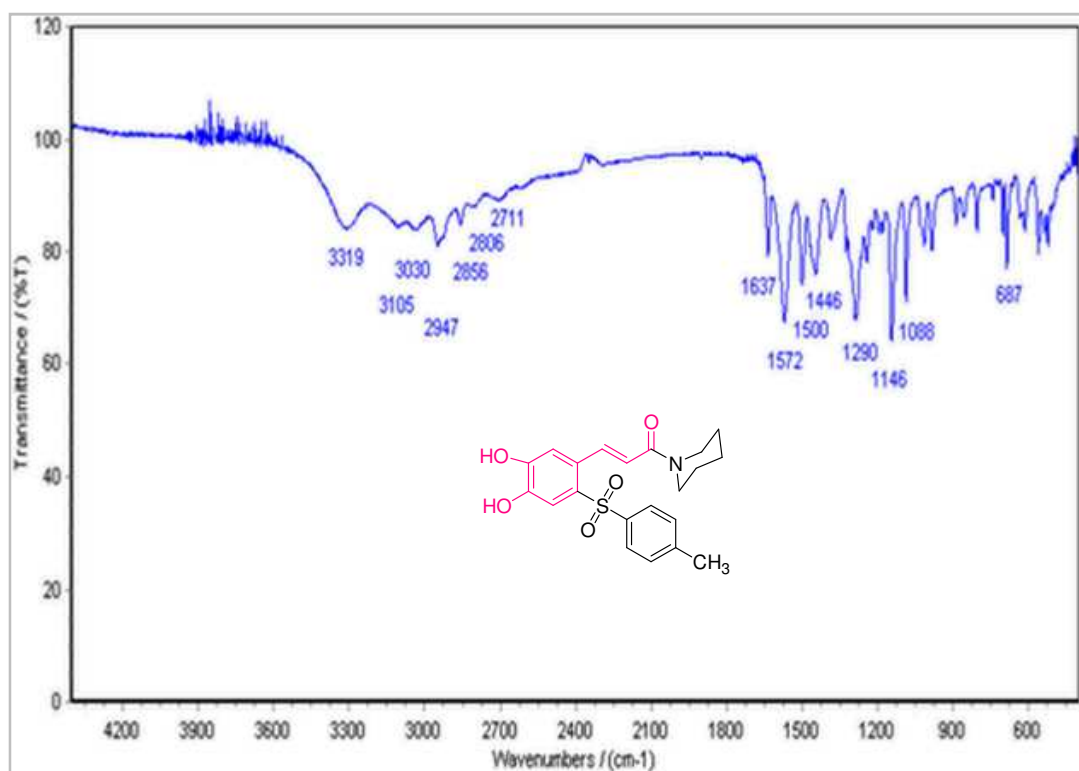

**Figure S-4.** FT-IR spectrum of compound **5a**



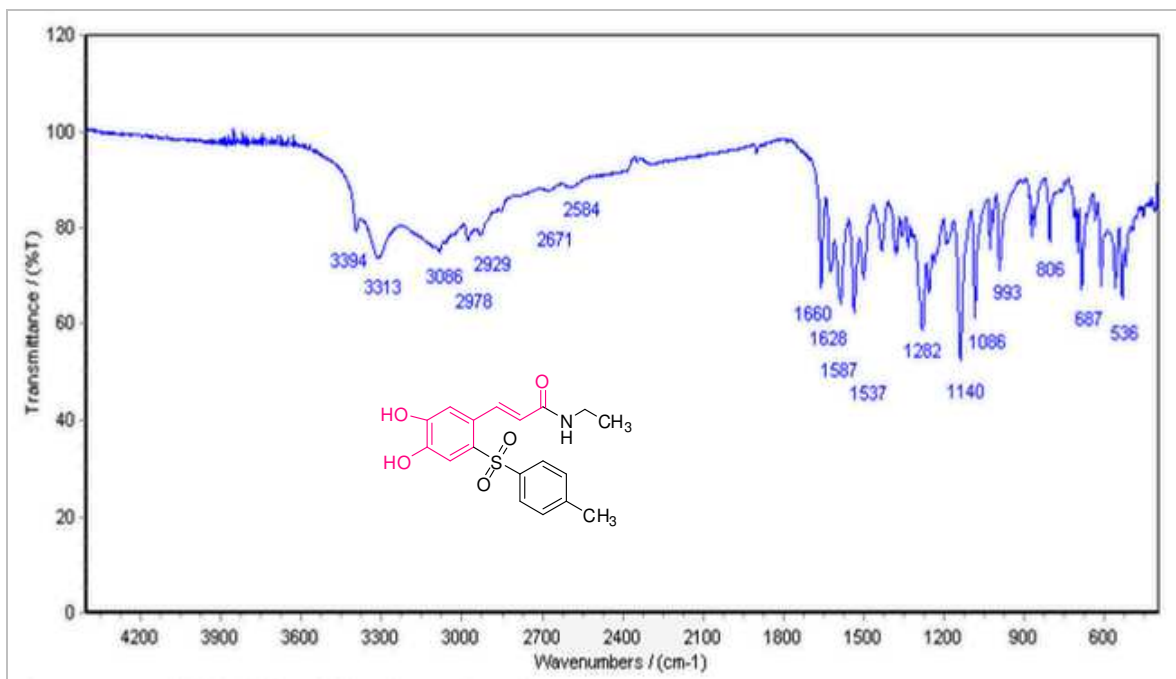

**Figure S-7.** FT-IR spectrum of compound **5b**

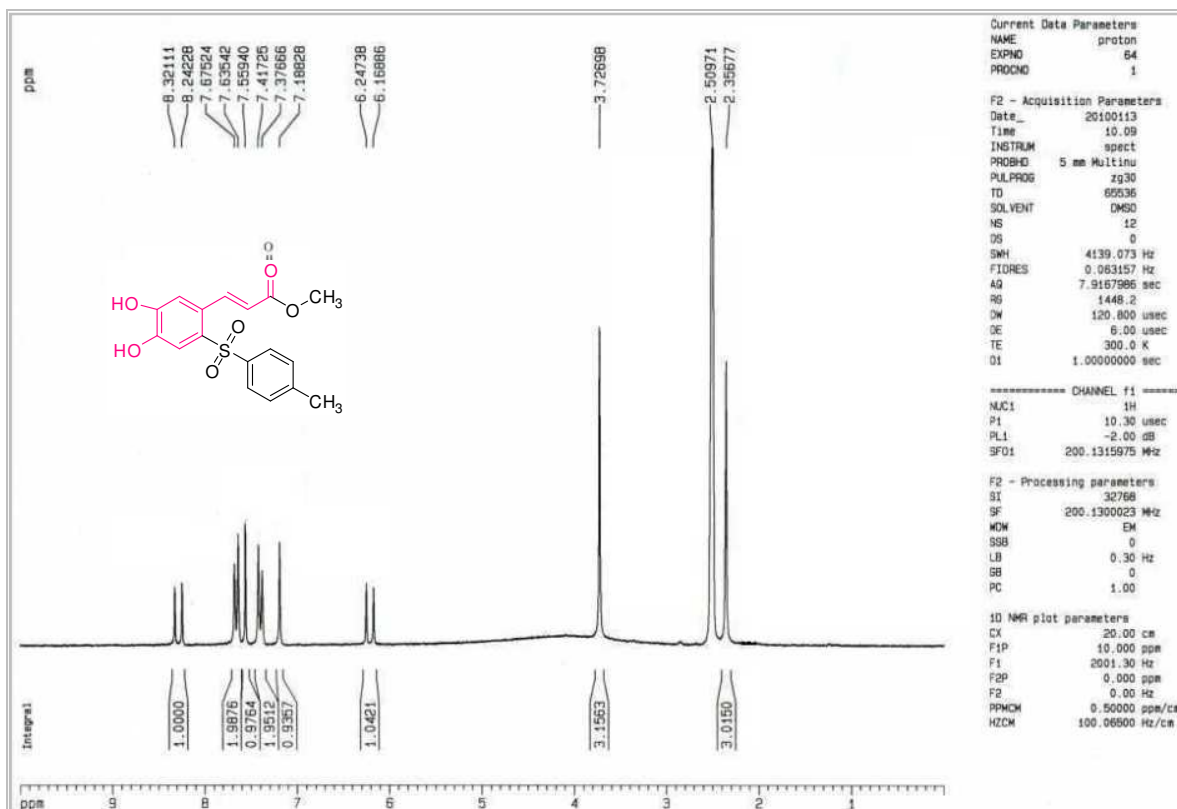

Figure S-8.  $^1\text{H}$  NMR spectrum of compound **5c** in  $\text{DMSO-d}_6$

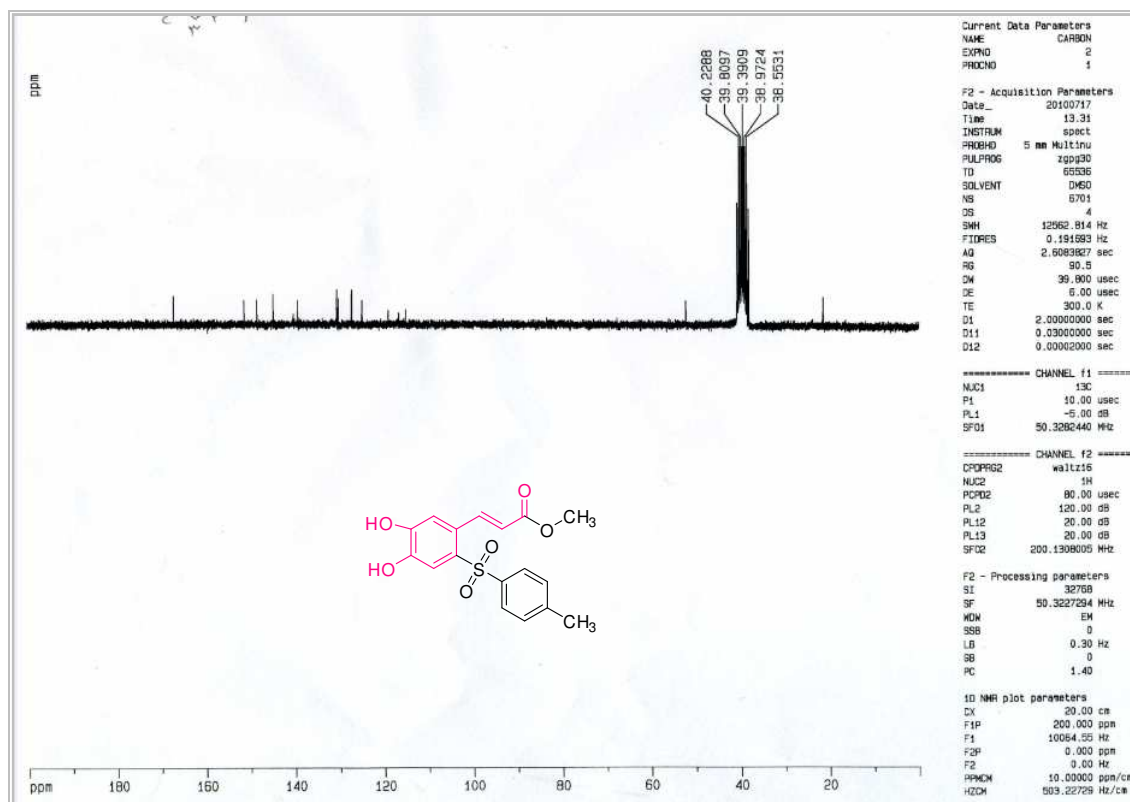

Figure S-9.  $^{13}\text{C}$  NMR spectrum of compound **5c** in  $\text{DMSO-d}_6$

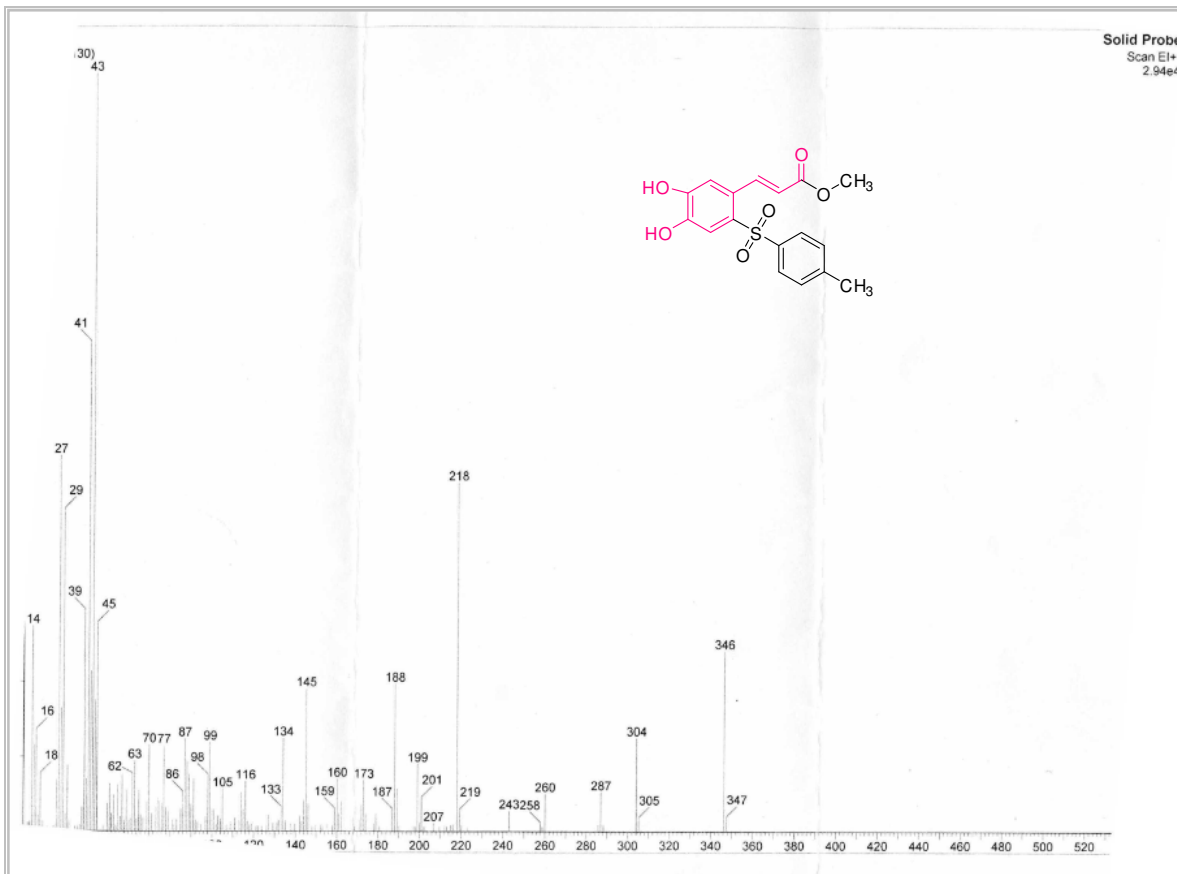

Figure S-10. Mass spectrum of compound 5c

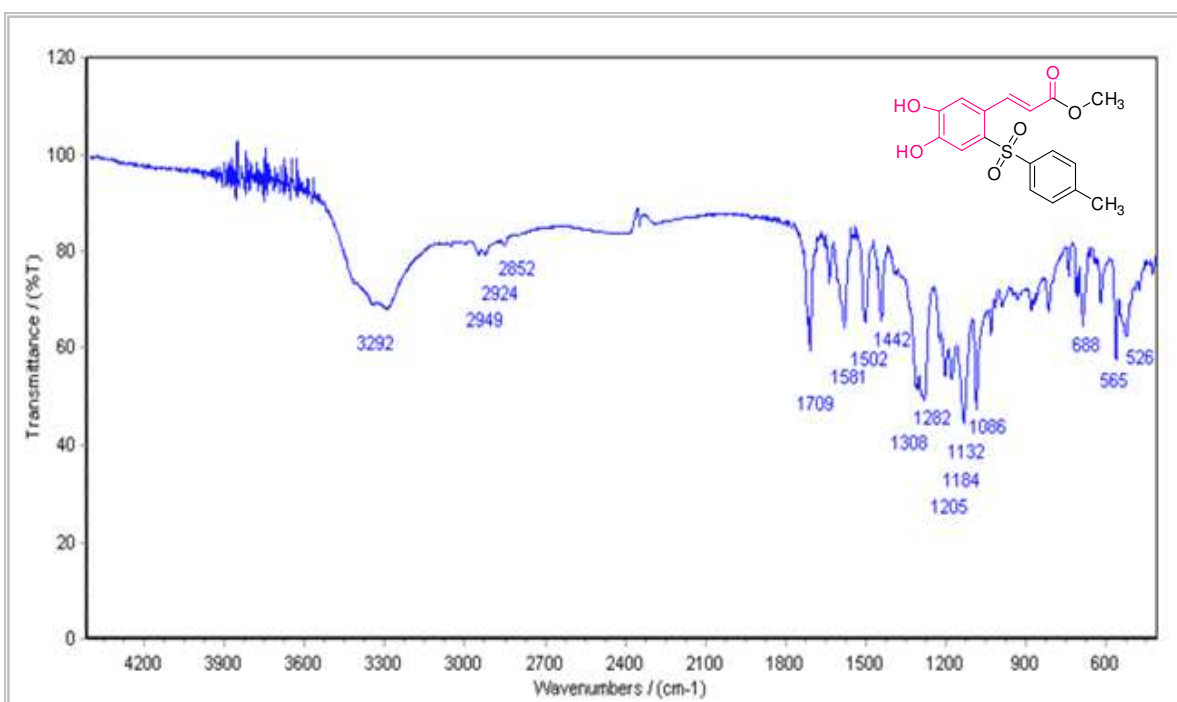

Figure S-11. FT-IR spectrum of compound 5c



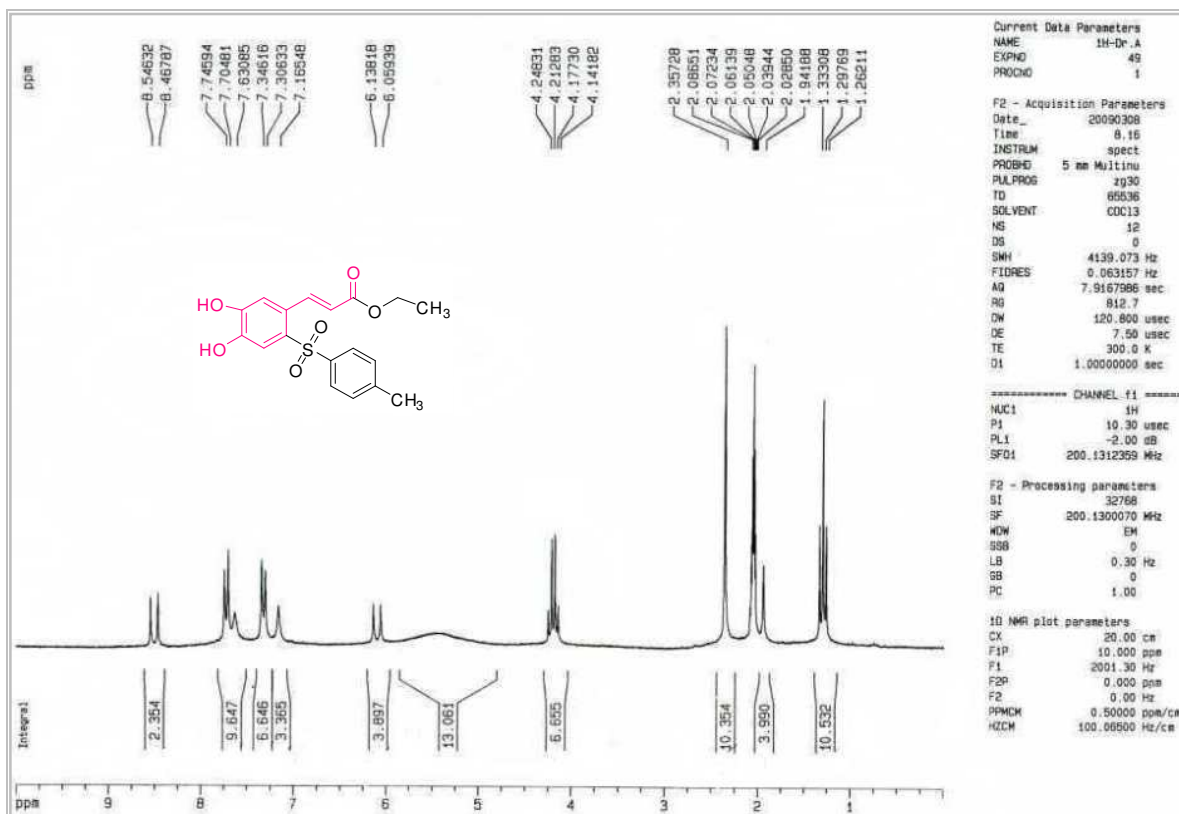

Figure S-12. <sup>1</sup>H NMR spectrum of compound **5d** in acetone-d<sub>6</sub>

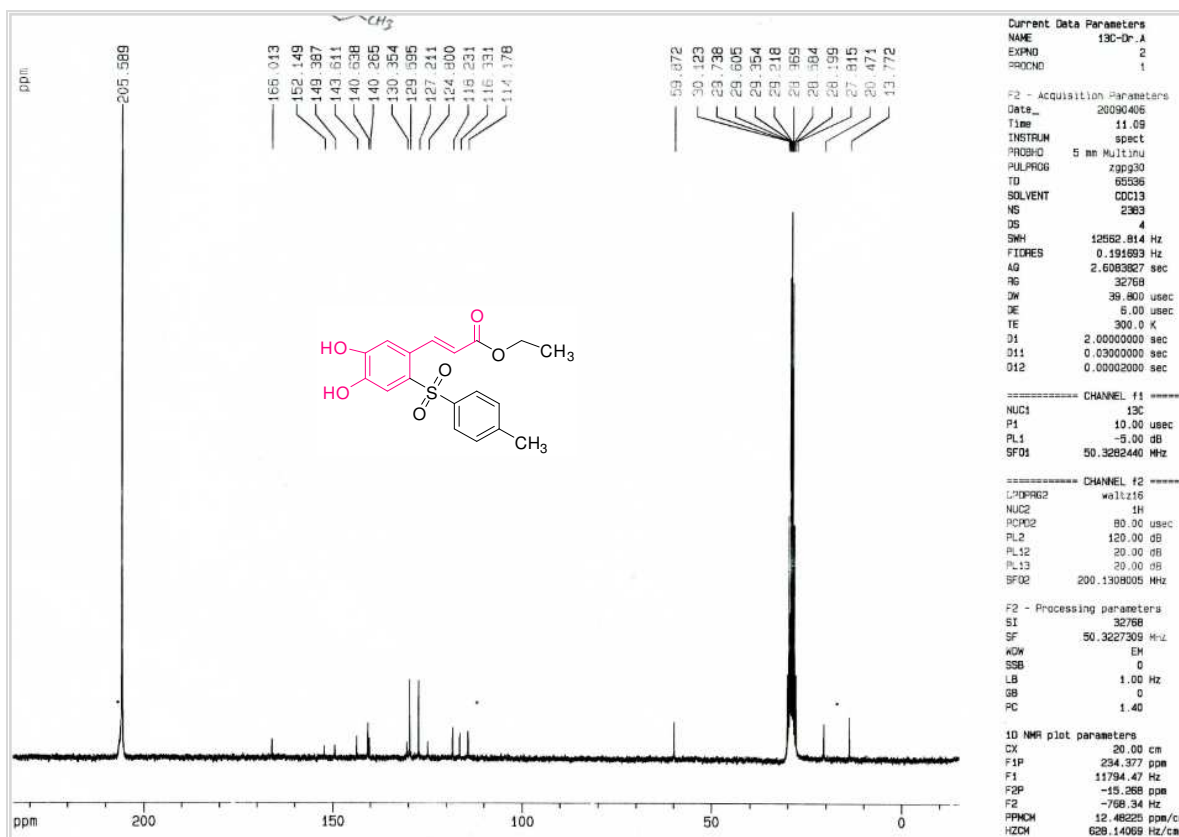

Figure S-13. <sup>13</sup>C NMR spectrum of compound **5d** in acetone-d<sub>6</sub>



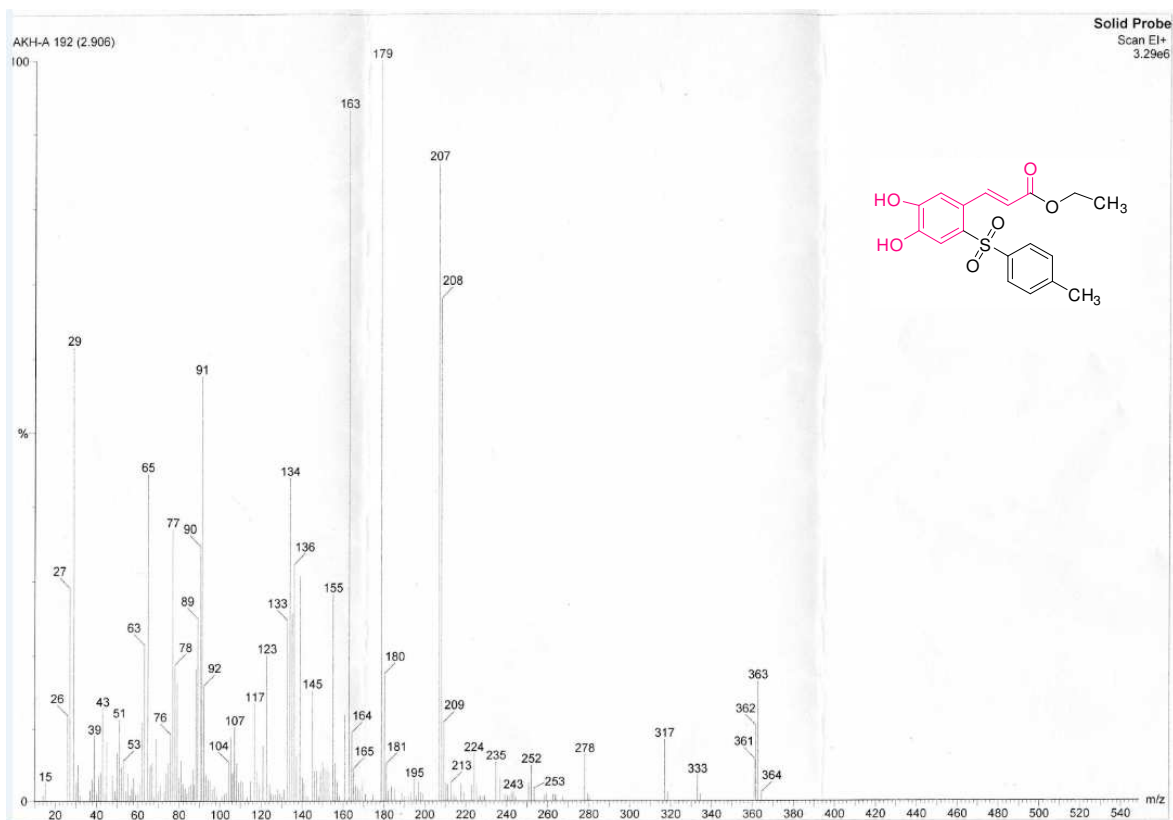

**Figure S-14.** Mass spectrum of compound **5d**

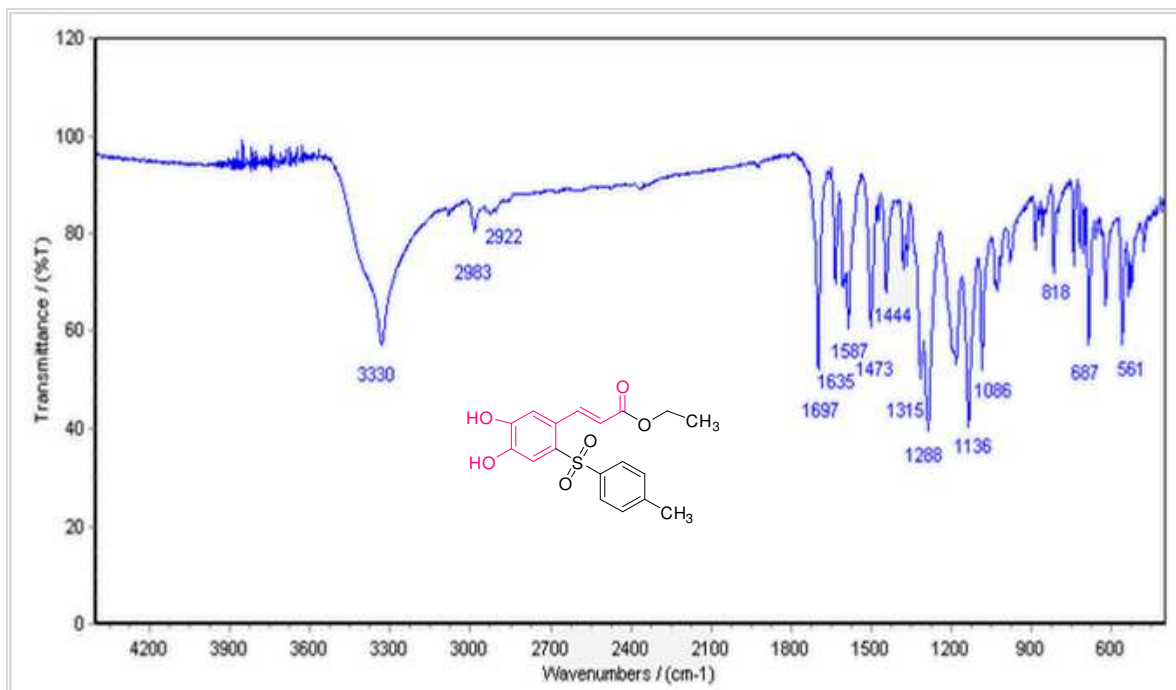

**Figure S-15.** FT-IR spectrum of compound **5d**

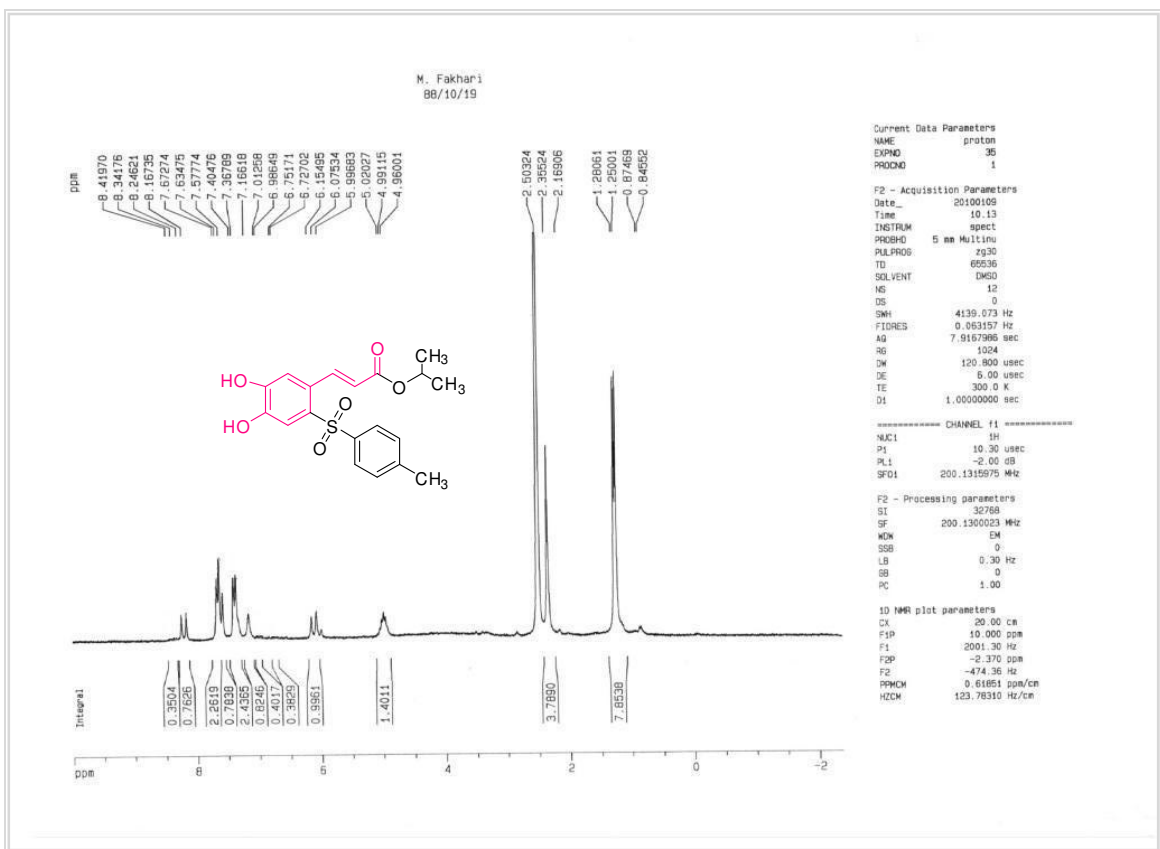

Figure S-16. <sup>1</sup>H NMR spectrum of compound **5e** in DMSO-d<sub>6</sub>

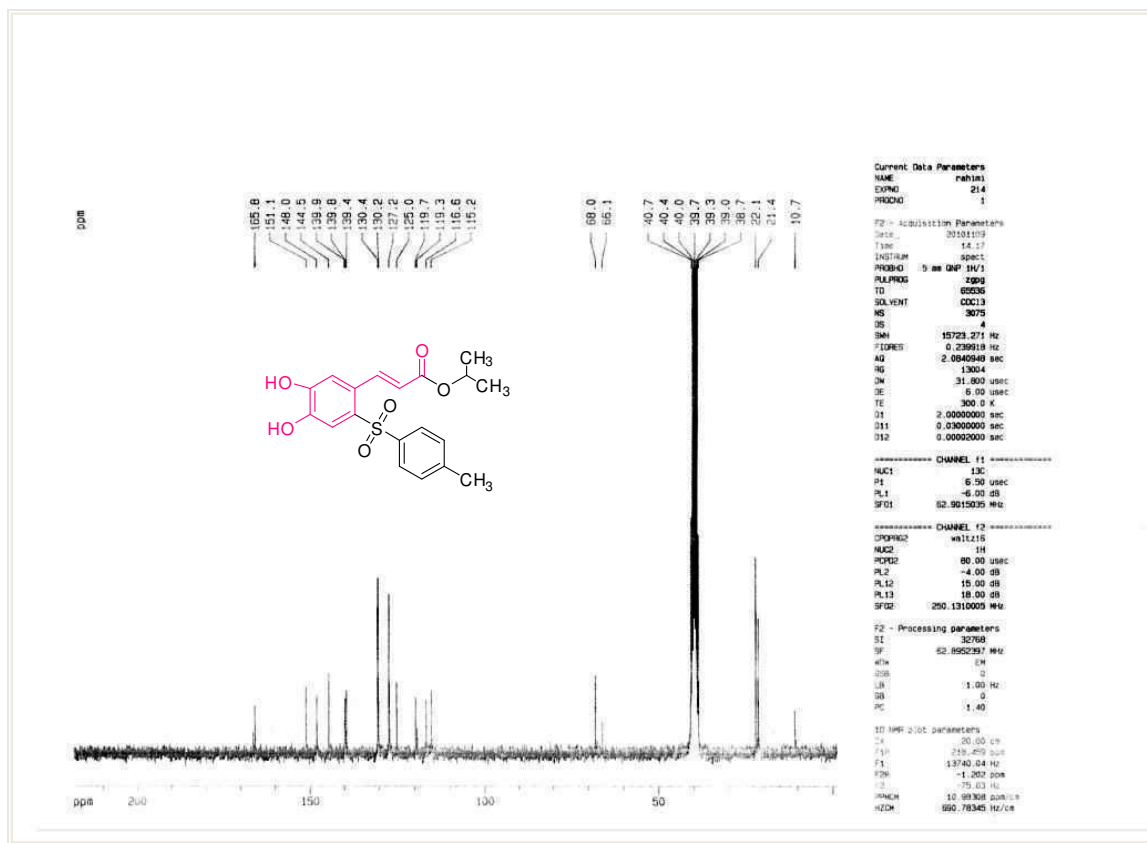

Figure S-17. <sup>13</sup>C NMR spectrum of compound **5e** in DMSO-d<sub>6</sub>

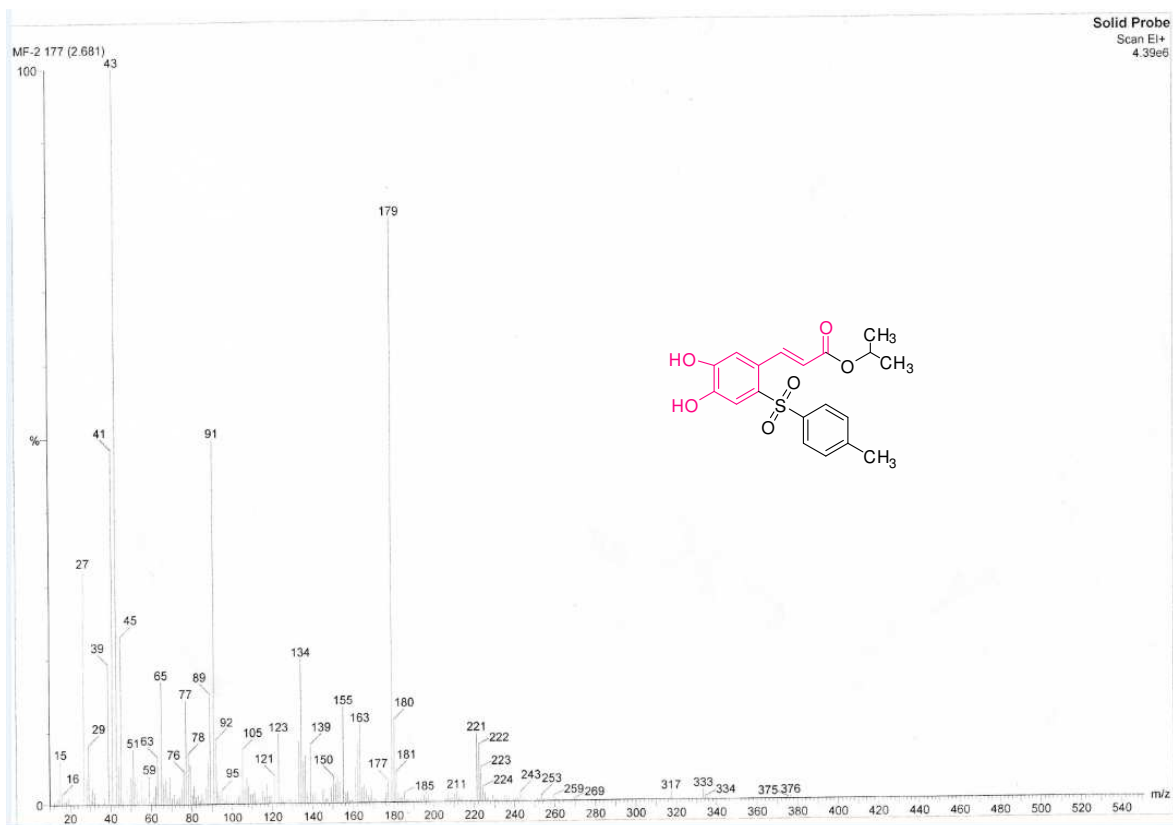

Figure S-18. Mass spectrum of compound 5e

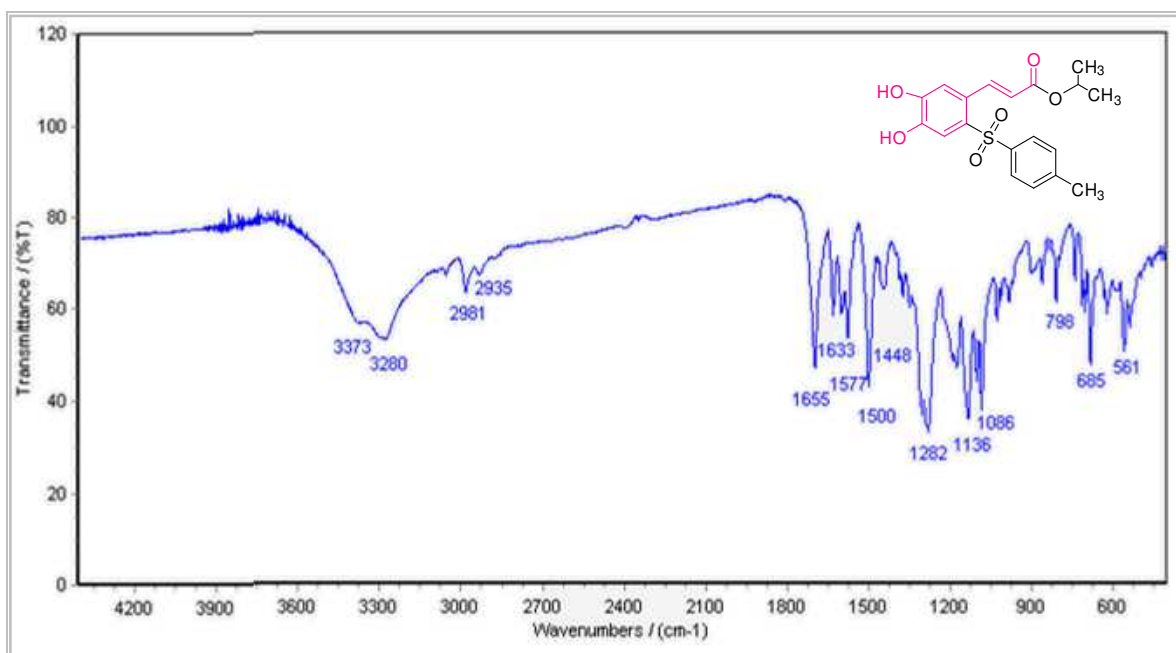

Figure S-19. FT-IR spectrum of compound 5e
